# Supplementary material for: U-Shaped Association between Plasma Manganese Levels and Type 2 Diabetes
Source: PubMed Central journal article supplement (PMC5132633; doi:10.1289/ehp176), 2016-06-03
Supplement: EHP176.s001.acco.pdf [file EHP176.s001.acco.pdf]

**Note to readers with disabilities:** *EHP* strives to ensure that all journal content is accessible to all readers. However, some figures and Supplemental Material published in *EHP* articles may not conform to [508 standards](#) due to the complexity of the information being presented. If you need assistance accessing journal content, please contact [ehp508@niehs.nih.gov](mailto:ehp508@niehs.nih.gov). Our staff will work with you to assess and meet your accessibility needs within 3 working days.

## **Supplemental Material**

### **U-Shaped Association between Plasma Manganese Levels and Type 2 Diabetes**

Zhilei Shan, Sijing Chen, Taoping Sun, Cheng Luo, Yanjun Guo, Xuefeng Yu, Wei Yang,  
Frank B. Hu, and Liegang Liu

#### **Table of Contents**

**Table S1** Association of the MnSOD Val16Ala polymorphism and T2D.

**Table S2** ORs for the association between the MnSOD Val16Ala polymorphism and T2D in subgroups.

**Table S3** ORs for the association between T2D and plasma manganese concentrations, according to the MnSOD Val16Ala polymorphism genotypes.

Table S1 Association of the MnSOD Val16Ala polymorphism and T2D.

|                  | <b>Controls,<br/>n (%)</b> | <b>Cases,<br/>n (%)</b> | <b>Crude OR<br/>(95% CI)</b> | <b>P value</b> | <b>Adjusted OR<sup>a</sup><br/>(95% CI)</b> | <b>P value</b> |
|------------------|----------------------------|-------------------------|------------------------------|----------------|---------------------------------------------|----------------|
| <b>Genotypes</b> |                            |                         |                              |                |                                             |                |
| TT               | 1206(74.72)                | 1184(73.36)             | 1                            |                | 1                                           |                |
| CT               | 378(23.42)                 | 392(24.29)              | 1.06(0.90-1.24)              | 0.51           | 1.03(0.85-1.25)                             | 0.77           |
| CC               | 30(1.86)                   | 38(2.35)                | 1.29(0.79-2.10)              | 0.3            | 1.07(0.60-1.92)                             | 0.81           |
| CT+CC            | 408(25.28)                 | 430(26.64)              | 1.07(0.92-1.26)              | 0.38           | 1.03(0.85-1.25)                             | 0.74           |
| TT+CT            | 1584(98.14)                | 1576(97.65)             | 1                            |                | 1                                           |                |
| CC               | 30(1.86)                   | 38(2.35)                | 1.27(0.78-2.07)              | 0.33           | 1.07(0.60-1.90)                             | 0.83           |

<sup>a</sup> adjusted for age, sex, BMI, current smoking status, current alcohol drinking status, physical activity, family history of diabetes and hypertension.

Table S2 ORs for the association between the MnSOD Val16Ala polymorphism and T2D in subgroups.

| Groups                   | MnSOD Val16Ala genotype |                 |                  | P value for interaction |
|--------------------------|-------------------------|-----------------|------------------|-------------------------|
|                          | TT                      | CT              | CC               |                         |
| <b>Levels of Mn</b>      |                         |                 |                  |                         |
| Low                      | 1                       | 1.23(0.89-1.69) | 0.79(0.34-1.84)  | 0.54                    |
| Moderate                 | 1                       | 0.99(0.69-1.43) | 0.90(0.32-2.52)  |                         |
| High                     | 1                       | 0.88(0.60-1.31) | 2.81(0.55-14.38) |                         |
| <b>Sex</b>               |                         |                 |                  |                         |
| Male                     | 1                       | 1.06(0.82-1.38) | 0.95(0.42-2.16)  | 0.35                    |
| Female                   | 1                       | 0.95(0.70-1.30) | 1.48(0.63-3.51)  |                         |
| <b>Age</b>               |                         |                 |                  |                         |
| < 55                     | 1                       | 1.11(0.79-1.56) | 0.89(0.29-2.67)  | 0.55                    |
| ≥ 55                     | 1                       | 1.00(0.78-1.28) | 1.12(0.57-2.21)  |                         |
| <b>BMI</b>               |                         |                 |                  |                         |
| < 24                     | 1                       | 0.91(0.69-1.21) | 0.79(0.33-1.88)  | 0.42                    |
| ≥ 24                     | 1                       | 1.13(0.85-1.50) | 1.37(0.60-3.11)  |                         |
| <b>Physical activity</b> |                         |                 |                  |                         |
| No or rare               | 1                       | 1.08(0.85-1.37) | 1.00(0.50-1.99)  | 0.06                    |
| Yes                      | 1                       | 0.90(0.63-1.29) | 1.30(0.44-3.85)  |                         |

Adjusted for age, sex, BMI, current smoking status, current alcohol drinking status, physical activity, family history of diabetes and hypertension.

Table S3 ORs for the association between T2D and plasma manganese concentrations, according to the MnSOD Val16Ala polymorphism genotypes.

| Variables        | Tertiles of plasma manganese concentration |         |                 | P value for interaction |
|------------------|--------------------------------------------|---------|-----------------|-------------------------|
|                  | 1 (Lowest)                                 | 2       | 3(Highest)      |                         |
| <b>TT</b>        |                                            |         |                 |                         |
| N(NGT/T2D)       | 410/575                                    | 386/272 | 410/337         |                         |
| OR               | 1.82(1.43-2.32)                            | 1       | 1.68(1.28-2.21) |                         |
| <b>CT</b>        |                                            |         |                 |                         |
| N(NGT/T2D)       | 115/188                                    | 142/95  | 121/109         | <b>0.54</b>             |
| OR               | 2.19(1.42-3.38)                            | 1       | 1.57(0.97-2.53) |                         |
| <b>CC</b>        |                                            |         |                 |                         |
| N(NGT/T2D)       | 13/17                                      | 13/10   | 4/11            |                         |
| OR               | 2.59(0.48-14.06)                           | 1       | 4.52(0.47-43.3) |                         |
| <b>CT&amp;CC</b> |                                            |         |                 |                         |
| N(NGT/T2D)       | 128/205                                    | 115/105 | 125/120         | <b>0.84</b>             |
| OR               | 2.41(1.61-3.61)                            | 1       | 1.59(1.02-2.49) |                         |

Adjusted for age, sex, BMI, current smoking status, current alcohol drinking status, physical activity, family history of diabetes, hypertension, plasma iron, plasma copper, and plasma selenium.
